# Supplementary material for: The first cobalt catalyzed [2 + 2 + 2] alkyne cyclotrimerization in aqueous medium at room temperature
Source: Royal Society of Chemistry journal article supplement (doi:10.1039/b207978j), 2002-01-01
Supplement: b207978j.doc [file b207978j.doc]

**Supplementary data**

**The First Cobalt Catalyzed [2+2+2] Alkyne Cyclotrimerization in Aqueous Medium at Room Temperature**

Li Yong, Holger Butenchön

Institut für Organische Chemie, Universität Hannover

Schneiderberg 1B, D-30167 Hannover, Germany, Fax: +49/(0)511/762-4616

E-mail: holger.butenschoen@mbox.oci.uni-hannover.de

**Experimental section:**

All reactions were performed in an argon atmosphere using the Schlenk technique. (Di-*tert*-butylphosphanyl-*P*-ethyl)cyclopentadienylcobalt(I) (**1**) was prepared according to the published procedure.1 The alkynes and solvents, which were purchased from Fluka, Aldrich, were degassed and used without further purification. Column chromatography was performed on Macherey and Nagel M 60 silica gel (40-63 µm). NMR: Bruker AVS 200 (1H: 200.1MHz, 13C: 50 MHz). – MS: Hewlett Packard 5898B (at 70 eV). – HRMS: Varian MAT 311.

**General procedure (GP)**:

To a 20 ml Schlenk flask, 0.05 mmol (16.2 mg, 5 mol%) of catalyst **1**, 1.00 mmol of alkyne, and 5 ml of degassed ethanol/water (20:80). The reaction mixture was stirred at room temperature for 6-8 hours (for the internal alkynes at 60oC). Then the reaction mixture was exacted with petroleum ether (3 x 20 ml). The combined organic layers were dried (MgSO4), filtered, and concentrated *in* *vacuo*. The residue was purified by flash column chromatography (petroleum ether or petroleum ether/ethyl acetate 40:1). Known arenes obtained were identified spectroscopically by comparison with their published data (MS, NMR). The isomeric ratio was determined by GC-MS of the crude product.

**Study of the effect of catalyst amount on the reaction:**

10 mol% of catalyst: GP, 0.10 mmol (32.4 mg ) of catalyst **1**, 102 mg (0.11 ml, 1.00 mmol) of phenylactylene (**2a**). 88 mg ( 0.29 mmol, 86 %) of **3a**/**4a** (66:34).

2 mol% of catalyst: GP, 0.02 mmol (6.5 mg) of catalyst **1**, 102 mg (0.11 ml, 1.00 mmol) of phenylactylene (**2a**). 75 mg (0.25 mmol, 74%) of **3a**/**4a** (69:31).

**3a**/**4a**:GP,102 mg (0.11 mL, 1.00 mmol) of phenylactylene (**2a**), 86 mg (0.28 mmol, 84 %) of **3a**/**4a** (69:31). Identified spectroscopically (1H NMR, MS) by comparison with literature data.2,3

**3b**/**4b**: GP, 82 mg (0.12 mL, 1.00 mmol) of 1-hexyne (**2b**), 76 mg (0.31 mmol, 93 %) of **3b**/**4b** (65:35). Identified spectroscopically (1H NMR, MS) by comparison with literature data.2,4

**3c**/**4c**: GP, 82 mg (0.12 mL, 1.00 mmol) of *tert*-butylactylene (**2c**), 61 mg (0.25 mmol, 74 %) of **3c**/**4c** (73:27). Identified spectroscopically (1H NMR, MS) by comparison with literature data.2,5,6

**3d**/**4d**: GP, 112 mg (2.00 mmol) of propargyl alcohol (**2d**), 7 ml of degassed ethanol/water (20:80), 100 mg (0.59 mmol, 89 %) of **3d**/**4d** (59:41). Identified spectroscopically (1H NMR, MS) by comparison with literature data.7

**3e**/**4e**: GP. 98 mg (1.00 mmol) of ethyl propionate (**2e**), 70 mg (0.24 mmol, 71 %) of **3e**/**4e** (59:41). Identified spectroscopically (1H NMR, MS) by comparison with literature data.8,9

**3f**/**4f**: 102 mg (1.00 mmol) of 5-chloro-1-pentyne (**2f**), 78 mg (0.25 mmol, 77 %) of **3f**/**4f** (76:24). - 1H NMR (200 MHz, 300K, CDCl3): **=** 7.15-7.51 (m, 3H, Ph), 3.57-3.69 (m, 6H, Ph-CH2), 1.99-2.03 (m, 6H, CH2), 0.89-1.19 (m, 6H, CH2). – MS (70 eV), *m/z* (%): 306(100, M+). HRMS calcd. for C15H21Cl3 306.0709, found: 306.0711.

**3g**/**4g**: GP, 166 mg (1.00 mmol) of 1-dodecyne, 151 mg (0.30 mmol, 91 %) of **3g**/**4g** (77:23). -1H NMR (200 MHz, 300K, CDCl3): **=** 7.21-6.81 (m, 3H, Ph), 2.53-2.56 (m, 6H, PhCH2), 2.13-2.21 (m, 6H, CH2), 2.01-2.07 (m, 6H, CH2). 1.41-1.63 (m, 36H, CH2), 0.88-0.93 (m, 9H, CH3). –MS (70 eV), *m/z* (%): 498 (100, M+). - HRMS calcd. for C36H66 498.5165, found: 498.5169.

**3h**/**4h**: 116 mg (1.00 mmol) of *para*-tolylethyne (**2h**), 94 mg (0.27 mmol, 81 %) of **3h**/**4h** (57:43). Identified spectroscopically (1H NMR, MS) by comparison with literature data.10,11

**5**: GP, 110 mg (1.00 mmol) of diisopropylethyne, 56 mg (0.17 mmol, 51 %) of **3i**. Identified spectroscopically (1H NMR, MS) by comparison with literature data.12,13

**6**: GP, 178 mg (1.00 mmol) of diphenylethyne, 84 mg (0.16 mmol, 47 %) of **6.** Identified spectroscopically (1H NMR, MS) by comparison with literature data.10,12,14

**7**: GP, 106 mg (1.00 mmol) of 1,7-octadiyne, 102 mg (1.00 mmol) of phenylethyne (**2a)** 91 mg (0.44 mmol, 44 %) of **7**. Identified spectroscopically (1H NMR, MS) by comparison with literature data.12,15

**8**: GP, 106 mg (1.00 mmol) of 1,7-octadiyne, 98 mg (1.00 mmol) of ethyl propionate (**2e**), 82 mg (0.40 mmol, 40 %) of **8**. Identified spectroscopically (1H NMR, MS) by comparison with literature data.15

**9**: GP, 106 mg (1.00 mmol) of 1,7-octadiyne, 41 mg (1.00 mmol) of acetonitrile, 94 mg (64 %) of **9**. Identified spectroscopically (1H NMR, MS) by comparison with literature data.16,17

1 J. Foerstner, R. Kettenbach, R. Goddard, and H. Butenschön, *Chem. Ber.* 1996, **129**, 319-325.

2 C. Breschi, L. Piparo, P. Pertici, A. M. Caporusso, and G. Vitulli, *J. Organomet. Chem.* 2000, **607**, 57-63.

3 J. E. Hill, G. Balaich, P. E. Fanwick, and I. P. Rothwell, *Organometallics* 1993, **12**, 2911-2924.

4 G. Giacomelli, A. M. Caporusso, and L. Lardice, *J. Chem. Soc., Perkin Trans. 1* 1977, 1333-1335.

5 A. K. Jhingan and W. F. Maier, *J. Org. Chem.* 1987, **52**, 1161-1165.

6 A. Funhoff, H. Schäufele, and U. Zenneck, *J. Organomet. Chem.* 1988, **345**, 331-339.

7 L. Gil, Y. Han, E. E. Opas, G. A. Rodan, R. Ruel, J. G. Seedor, P. C. Tyler, and R. N. Young, *Bioorg. Med. Chem.* 1999, **7**, 901-919.

8 E. E. Schweizer and J. E. Hayes, *J. Org. Chem.* 1988, **53**, 5562-5564.

9 C. B. Kanner and U. K. Pandit, *Tetrahedron* 1982, **38**, 3597-3604.

10 P. K. Thallapally, K. Chakraborty, H. L. Carrell, S. Kotha, and G. R. Desijaru, *Tetrahedron* 2000, **56**, 6721-6728.

11 J. Li, H. Jiang, and M. Chen, *J. Org. Chem.* 2001, **66**, 3627-3629.

12 R. L. Hillard III and K. P. C. Vollhardt, *J. Am. Chem. Soc.* 1977, **99**, 4058-4069.

13 J. Siegel, A. Gutiérrez, W. B. Schweizer, O. Ermr, and K. Mislow, *J. Am. Chem. Soc.* 1986, **108**, 1569-1575.

14 C. Müller, R. J. Lachiotte, and W. D. Jones, *Organometallics* 2002, **21**, 1975-1981.

15 C. J. du Toit, J. A. K. Du Plessis, and G. Lachmann, *J. Mol. Catal.* 1989, **53**, 67-78.

16 T. Tsuda and H. Maehara, *Macromolecules* 1996, **29**, 4544-4548.

17 G. Vitulli, S. bertozzi, M. Vignali, R. Lazzaroni, and P. Salvadori, *J. Organomet. Chem.* 1987, **326**, C33-C36.
